# Supplementary material for: Robust Prognostic Gene Expression Signatures in Bladder Cancer and Lung Adenocarcinoma Depend on Cell Cycle Related Genes
Source: PLoS One. 2014 Jan 22;9(1):e85249. doi: 10.1371/journal.pone.0085249 (PMC3898982; doi:10.1371/journal.pone.0085249)
Supplement: File S7 — Prognostic bladder progression and lung adenocarcinoma survival gene signatures used in the adjustment analysis (Table S11) (Excel XLSX file). (XLS) [file pone.0085249.s007.xls]

## Sheet: BL signatures
CNUH	Dyrskjot	Lindgren	Wang
S100A8	D4S234E	DCPS	FABP4
CELSR3	UGT1A6	ARHGDIB	GSTM4
PFKFB4	CCND1	KRT13	SERPINA1
HMOX1	CD46	ZDHHC3	HDAC1
MTAP	MBNL2	MAPKAPK3	TPX2
C16orf74	TMEM30B	PTDSS1	DYNLRB1
KIF1A	COBLL1	SLC5A6	PTK6
COCH	SALL4	HMGCS1	UBC
DSC3	TANC2	KIAA1033	MGMT
PPP1R14C	SERPINB5	UQCRC1	ITGB3BP
	C10orf58	CSPP1	PAIP2
	MAT2B	CAND1
	SORL1	ZNF266
	TMEM59	FOXF2
	ADAM10	RPS15A
	BMPR2	CRY1
	CAST	APOLD1
	MARCKS	AVEN
	FGFR3	QARS
	FAT1	SIPA1L1
	UBB	NPDC1
	MAN2A1	SF3B1
	CYB5R2	ZNF385A
	LOC647580	ELOVL5
	SMAD5	SLC11A2
	NCKAP1	PPA2
	EFR3A	ARHGAP1
	MRE11A	CDCA7
	THEM14A	PNMA1
	MUDENG	MLF1IP
	CXADR	FYCO1
	PLBD1	ZNF146
	VPS35	GFRA1
	GALNT1	USP4
	FBXL5	MGST2
	ALOX5	PDLIM5
	OAZ1	CDK2
	ARIH1	OXA1L
	ATRX	ZNF107
	CYFIP1	SENP5
	GLUL	FNBP4
	CHUK	RBM15B
	PLA2G2F	GALNT12
	RTN4	TOPBP1
	SF3B1	ACSL3
	RP5-821D11.2	EIF3G
	GNAL	B3GALNT2
	BIRC6	LOC219854
	MAPKSP1	ACP2
	TAF7	ABLIM1
	PIF1	ABR
	LOC151579	WFS1
	DKFZP586H2123	CUGBP1
	PARP14	VBP1
	MAST2	SOX9
	FXR1	COX4I1
	IGF2	C1orf103
	EIF1AX	RPS6KA4
	THEM29	CLTC
	CDC25B	CTSH
	RNF139	RAI14
	NRG1	CCNA2
	MACF1	ARHGEF6
	SMARCA4	NCAPG2
	RAD51L1	ATP5D
	FER1L4	VDAC2
	PLXND1	ACSL1
	COL4A2	TMEM44
	FOXJ3	PPL
	CATSPER2	GNB2L1
	PLK1	CRTAP
	UBE2S	C11orf49
	MCM7	ARL2
	PILRB	TRIM11
	PHKA2	GYS1
	CDC20	CHD6
	BIRC5	ISOC2
	AURKB	NUCB2
		EEF2
		PRMT2
		ATAD2
		CHUK
		SELENBP1
		MCM8
		IFI35
		SMARCA4
		TOLLIP
		LZTS2
		BCL10
		GSTM4
		ZNF436
		KIAA1530
		TMEM9B
		LRRFIP1
		FUCA1
		EXOSC7
		TRIM29
		CD58
		FLJ36031

## Sheet: LA signatures
Bianchi	MethodC	MethodD	MethodF	MethodG	MethodH	Kadara	Onaitis	Son	Tomida
NUDCD1	STXBP1	ABAT	FCGBP	CAPRIN1	RFC2	UBE2C	CTSH	GALNT14	TM2D2
E2F1	S100A8	ADCY9	IL10	RRM1	STMN1	MCM2	SFTPC	BST2	RPP40
HOXB7	DMD	ATP11A	SORL1	TBL1X	HSPA1A	MCM6	CEBPA	CALB1	PGRMC1
MCM6	CDC6	C4B	DNAJB4	ST6GAL1	H2AFZ	FEN1	FOSB	MMP7	C11orf73
SERPINB5	ADCY9	NDNF	GCLM	HTATSF1	PPM1G	TPX2	PTGDS	SLC1A7	RNF170
E2F4	HLF	CLCC1	RFC3	SAFB2	DEK		SMAGP	GALNT6	FARSB
HSPG2	CHEK1	CMAHP	TUBB2A	LMAN1	KPNA2		CD74	POU2AF1	IFT52
SF3B1	STEAP1	CNKSR1	ENPP4	MFNG	TUBA1B		C1orf116	AK4 /// AK3L1 /// AK3L2	PRPF4B
RRM2	GNG7	COL4A3	TLE4	STC1	CBX3		ERAP1	PTGDS	CXorf56
SCGB3A1	HMGA2	CYP2B6	LYPD3	CD27	CSE1L		JUN	AHNAK2	API5
	PGCP	PARM1	DNALI1	SCAMP1	PCNA			POSTN	PICALM
	PITX1	DLC1	SIK1	SPAG9	TOP2A			GSTA1	VBP1
	ANKHD1	DMD	TCP1	EDIL3	MARS			CCL19	PSMD10
	EPHX2	EPOR	UQCRFS1	RAB28	RRM1			PLAU	COIL
	ABAT	FOSL1	TUBA1A	CENPI	DKC1			TCN1	PIGU
	RBPMS	FOXE3	ABAT	CHIT1	UBL3			IFI44	SMARCE1
	RBPMS	HLF	SLC9A3R2	C4B	MCM3			SLC1A1	LIME1
	DLC1	HMGA2	CTSL2	ABAT	DDX39A			SLC39A8	STK38
	MAOA	CADM1	CACNA1D	CUL4B	DNMT1			PKIB	C7orf70
	INPP5B	INPP5B	INHA	PSTPIP1	MYBL2				SRP9
	INPP5B	KIAA0754	PCDHA3	FGF18	MTHFD2				NOL11
	RRP15	LRIG1	SORL1	PDCD4	PSME2				OR11A1
	EPOR	LTBP3	COL9A2	ARID5A	SNRPA				UMPS
	PPP2R1B	MAOA	FAM189A2	ITGA4	NCAPD2				TADA2A
	BCAM	MUC5AC	PRPF31	SC5DL	HDAC2				UBE2Q2
		PGCP	BRCA2	CAMK1G	RRM2				PSMD12
		PPP2R1B	EXOSC8	SMURF1	PSRC1				ZBTB9
		RBPMS	ABCC6	CTAGE5	CKS1B				EIF2S1
		RHOBTB2	PDXK	PGK1	MCM6				CBWD3
		S100A8	WDR12	EVL	BIRC5				C6orf62
		SBF1	TPPP3	FOSL2	IGBP1				ARMC8
		SLC2A1	FOSL2	WDR60	MCM2				ZNF525
		ST3GAL6	TMC5	LIN7C	NUP62				RANBP9
		ST6GAL1	SLCO4A1	CAMKMT	TK1				VDAC3
		STC2	LRRC31	DEPDC1	RANBP1				MTERFD1
		TMPRSS11E	WLS	STX16	KIAA0101				ELF5
			CEP76		FOXM1				FIP1L1
					TYMS				TMEM14B
					TOPBP1				CKAP5
					ACTL6A				COL9A1
					CAD				ZBTB33
					LIG1				HNRNPH3
					PHKB				UBE2W
					R3HDM1				HSD17B12
					UBE2S				UBE2V2
					HPRT1				RBM34
					CDC20				RBMX
					LSM5				CACYBP
					MSH6				BRWD1
					UBE2C				HNMT
					HLTF				RIOK1
					RNASEH2A				GOLGA7
					TIMELESS				E2F6
					KIF2A				PDCL3
					SPAG5				EIF2S2
					RFC5				TIPRL
					POLD1				SEC22A
					DTYMK				METTL2A
					LMNB1
					DCK
					EZH2
					MAD2L1
					MMD
					CCNA2
					FAM8A1
					TMPO
					PTTG1
					E2F3
					BUB1B
					DLGAP5
					SNRPF
					VRK1
					CDC6
					CHAF1A
					RFC4
					ZWINT
					TRIP13
					AURKA
					CDC45
					RFC3
					RAD51AP1
					NDC80
					WASF1
					CKS2
					SMC2
					DBF4
					GTSE1
					TTF2
					KIF11
					ARHGAP11A
					CDC7
					RAD54L
					NEK2
					TROAP
					CDC25A
					KIF23
					WDHD1
					PARP2
					NUDT1
					FEN1
					TTK
					MELK
					PLK4
					PLK4
					E2F1
					CENPA
					CCNE2
					CENPE
					PRIM1
					SCAF11
					ZEB2
					ORC1
					CDC25C
					SLC16A4
					RBL1
					CHEK1
					MRE11A
					H2AFX
					SNRPG
					BLM
					SNRPA1
					HMGA1
					GINS1
					SPHAR
					KNTC1
					KIF14
					PRMT1
					NUP155
					HMMR
					GPR19
					ABI2
					NFATC3
					CENPF
					DDX11
					CCT5
					SAP18
					UBE2I
					HNRNPR
					MCM7
					HMGB2
					SNRPB
					ILF3
					TUBB
					GABARAPL2
					WHSC1
					HNRPDL
					TUBA1C
					XPC
					KIF2C
					AURKB
					BUB1
					KIFC1
					CDKN3
					CDT1
					SPC25
					TPX2
					RPL39L
					GCFC2
					TUBA3C
					RECQL
					MKI67
					TMEM87A
					PSME4
					NUP205
					ATP13A3
					NUP210
					RBL2
					YIPF6
					TMEM194A
					CKAP5
					NCAPH
					FANCI
					DNAJC9
					C13orf27
					GAPDH
					RECQL4
					PSMC3IP
					TDRD3
					GMPS
					RIF1
					CCNB1
					BRCA2
					CENPI
					GRB2
					PHTF2
					MCM5
					LMNB2
					ITCH
					SKA1
					PRC1
					NUSAP1
					TMEM48
					ASF1B
					CRBN
					FYCO1
					CKAP2
					TACC3
					KIF4A
					U2AF2
					FBXO3
					RNASEH1
					CEP55
					DTL
					HAUS6
					NCAPG
					HJURP
					KIF20A
					ATAD2
					MLYCD
					FBXO5
					MLF1IP
					MYO5C
					DSCC1
					LMF1
					PBK
					MRPL11
					KIF15
					SHCBP1
					C1orf54
					DSN1
					C16orf59
					NCAPG2
					ERCC6L
					ECT2
					ASPM
					E2F8
					PARPBP
					HELLS
					KLHL7
					DEPDC1
					MCM10
					CRYL1
					RNF31
					C1orf112
					TRIM8
					CCPG1
					YEATS2
					KIF18A
					CDCA3
					RPL15
					CDCA8
					PRMT2
					DONSON
					BRIP1
					ANGEL2
					MCM4
					RACGAP1
					ESPL1
					ACACB
					SENP5
